# Supplementary material
Source: Springer Nature journal article supplement (https://www.springermedizin.de/resource/supplementary/13256_2013_2705_MOESM3_ESM.pdf/9651260)

a

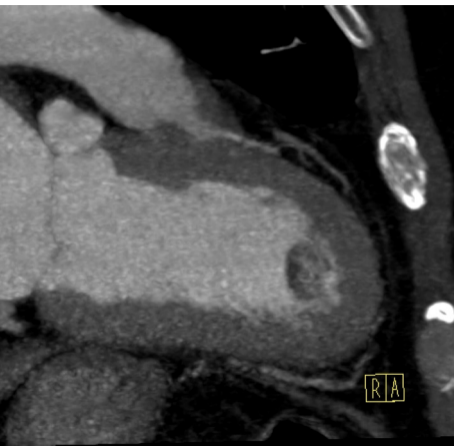

b

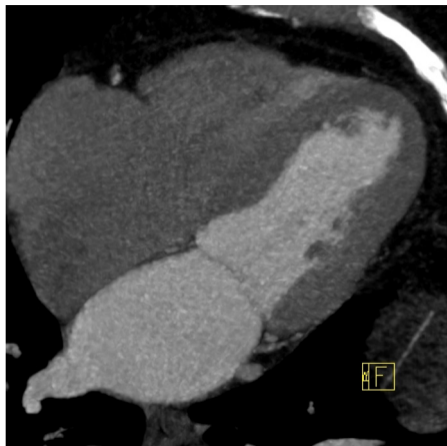

Supplement: MOESM3 [file 9651260]
